# Supplementary material for: Spray-Dried Amorphous Solid Dispersions of Atorvastatin Calcium for Improved Supersaturation and Oral Bioavailability
Source: PubMed Central journal article supplement (PMC6781288; doi:10.3390/pharmaceutics11090461), 2019-09-06
Supplement: pharmaceutics-11-00461-s001.pdf [file pharmaceutics-11-00461-s001.pdf]

## Supplementary Materials: Spray-Dried Amorphous Solid Dispersions of Atorvastatin Calcium for Improved Supersaturation and Oral Bioavailability

Jaewook Kwon, Bhupendra Raj Giri, Eon Soo Song, Jinju Bae, Junseong Lee and Dong Wuk Kim

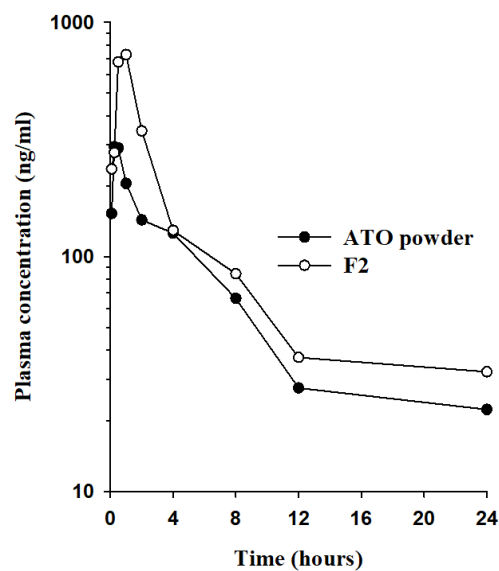

**Figure S1.** Plasma concentration (log scale)–time profiles of ATO after oral administration of free drug or solid dispersions in rats.
